# Supplementary material for: Synthesis of Indole Derived Protease-Activated Receptor 4 Antagonists and Characterization in Human Platelets
Source: PubMed Central journal article supplement (PMC3679140; doi:10.1371/journal.pone.0065528), 2013-06-11
Supplement: pone.0065528.s001.pdf [file pone.0065528.s001.pdf]

| Compound  | Structure | Compound  | Structure |
|-----------|-----------|-----------|-----------|
| YD-3      |           | VU0469901 |           |
| 1         |           | VU0469902 |           |
| 2         |           | VU0469903 |           |
| 3         |           | VU0469904 |           |
| 4         |           | VU0469905 |           |
| 5         |           | VU0469906 |           |
| 6         |           | VU0469907 |           |
| VU0469133 |           | VU0469908 |           |
| VU0469150 |           | VU0469909 |           |
| VU0469151 |           | VU0469910 |           |
| VU0469152 |           | VU0469911 |           |
| VU0469153 |           | VU0469912 |           |
| VU0469154 |           | VU0476680 |           |
| VU0469155 |           | VU0476682 |           |
| VU0469873 |           | VU0476683 |           |
| VU0469897 |           | VU0476684 |           |
| VU0469898 |           | VU0476686 |           |
| VU0469899 |           | VU0476688 |           |
| VU0469900 |           | VU0476689 |           |
